# Supplementary material for: Accelerometry predicts muscle ultrastructure and flight capabilities in a wild bird
Source: Oxford University Press journal article supplement (doi:10.1242/jeb.234104), 2020-01-01
Supplement: jeb234104supp.pdf [file jeb234104supp.pdf]

Table S1

[Click here to Download Table S1](#)
